# Supplementary material for: Thrap3 promotes nonalcoholic fatty liver disease by suppressing AMPK-mediated autophagy
Source: Springer Nature journal article supplement (doi:10.1038/s12276-023-01047-4), 2023-08-01
Supplement: MOESM1 [file 12276_2023_1047_MOESM1_ESM.pdf]

**Supplementary Information**

**Thrap3 promotes nonalcoholic fatty liver disease by suppressing AMPK-mediated autophagy**

**Hyun-Jun Jang<sup>1,2,\*</sup>, Yo Han Lee<sup>1,\*</sup>, Tam Dao<sup>4</sup>, Yunju Jo<sup>4</sup>, Keon Woo Khim<sup>1</sup>, Hye-jin Eom<sup>1</sup>, Ju Eun Lee<sup>1</sup>, Yi Jin Song<sup>1</sup>, Sun Sil Choi<sup>1</sup>, Kieun Park<sup>1</sup>, Haneul ji<sup>1</sup>, Young Chan Chae<sup>1</sup>, Kyungjae Myung<sup>5</sup>, Hongtae Kim<sup>1</sup>, Dongryeol Ryu<sup>4</sup>, Neung Hwa Park<sup>3,†</sup>, Sung Ho Park<sup>1,†</sup>, Jang Hyun Choi<sup>1,†</sup>**

<sup>1</sup>Department of Biological Sciences, Ulsan National Institute of Science and Technology (UNIST), Ulsan 44919, Republic of Korea

<sup>2</sup>Herbal Medicine Resources Research Center, Korea Institute of Oriental Medicine, Naju 58245, Republic of Korea

<sup>3</sup>Department of Internal Medicine, University of Ulsan College of Medicine, Ulsan University Hospital, Ulsan 44033, Republic of Korea

<sup>4</sup>Department of Molecular Cell Biology, Sungkyunkwan University (SKKU) School of Medicine, Suwon 16419, Republic of Korea

<sup>5</sup>Center for Genomic Integrity, Institute for Basic Science, Ulsan 44919, Republic of Korea

**<sup>†</sup>Corresponding Author:**

**Jang Hyun Choi**, Department of Biological Sciences, Ulsan National Institute of Science and Technology (UNIST), Ulsan 44919, Republic of Korea. Tel.: +82 52 217 2543; Fax: +82 52 217 3219; E-mail: janghchoi@unist.ac.kr

**Sung Ho Park**, Department of Biological Sciences, Ulsan National Institute of Science and Technology (UNIST), Ulsan 44919, Republic of Korea. Tel.: +82 52 217 5203 E-mail: parksu@unist.ac.kr

**Neung Hwa Park**, Department of Internal Medicine, University of Ulsan College of Medicine, Ulsan University Hospital, Ulsan 44033, Republic of Korea. E-mail: nhparkmd@gmail.com

**\*These authors contributed equally to this work**

27 **Supplementary Table 1: siRNA sequences.**

| Name           | Sequence              |
|----------------|-----------------------|
| si <i>Ampk</i> | AUGAUGUCAGAUGGUGAAUUU |

28

29 **Supplementary Table 2: Primer sequences.**

| Gene symbol    | Sequences of the primer for qPCR |                         |
|----------------|----------------------------------|-------------------------|
|                | Forward primer                   | Reverse primer          |
| <i>Thrap3</i>  | TCTCGGTCTCGTTCGTTTTCA            | TCCTTTCTCTGTTATGAGCTGGA |
| <i>Ppara</i>   | TCAGGGTACCACTACGGAGT             | CTTGGCATTCTTCCAAAGCG    |
| <i>Cpt1a</i>   | AGTTCCATGACCCATCTCTGTC           | TTCTTCTTCCAGAGTGCAGC    |
| <i>Acox1</i>   | TAAGTTCCTCACTCGAAGCCA            | AGTTCCATGACCCATCTCTGTC  |
| <i>Srebfl</i>  | GGAGCCATGGATTGCACATT             | CTTCCAGAGAGGAGGCCAG     |
| <i>Chrebp</i>  | CATCTCCAGCCTCGTCTTC              | CTTGGTCTTAGGGTCTTCAGG   |
| <i>Fasn</i>    | GGAGGTGGTGATAGCCGGTAT            | TGGGTAATCCATAGAGCCAG    |
| <i>Gpat1</i>   | CTTGGCCGATGTAAACACACC            | CTTCCGGCTCATAAGGCTCTC   |
| <i>Gpat2</i>   | AGCAGAGGAGTAACCACAATGG           | GGGCGATACTTTCCCAGGA     |
| <i>Agpat1</i>  | TAAGATGGCCTTCTACAACGGC           | GGAAGTCTGGTGGTTGGACAC   |
| <i>Agpat2</i>  | CAGCCAGGTTCTACGCCAAG             | TGATGCTCATGTTATCCACGGT  |
| <i>Dgat1</i>   | GTGCCATCGTCTGCAAGATTC            | GTGCCATCGTCTGCAAGATTC   |
| <i>Dgat2</i>   | GCGCTACTTCCGAGACTACTT            | GGGCCTTATGCCAGGAACT     |
| <i>Cd36</i>    | GCGACATGATTAATGGCACAG            | GATCCGAACACAGCGTAGATAG  |
| <i>Fatp1</i>   | CTGGGACTTCCGTGGACCT              | TCTTGCAGACGATACGCAGAA   |
| <i>Fatp2</i>   | CGAGACGAGACGCTCACCTA             | ACGAATGTTGTAGTTGAGGCAC  |
| <i>Fatp3</i>   | ATGGGGCTCCACCTATGGG              | TGGCACTGTAGAACCCTCAGA   |
| <i>Fatp4</i>   | ACTGTTCTCCAAGCTAGTGCT            | GATGAAGACCCGGATGAAACG   |
| <i>Fatp5</i>   | TCTATGGCCTAAAGTTCAGGCG           | CTTGCCGCTCTAAAGCATCC    |
| <i>Fatp6</i>   | GTCATGGCTCACAGGATTGGG            | CACGTCCTCGTAGGTGTAGAC   |
| <i>Pik3ca</i>  | ACGACCATCTTCGGGTGAAC             | CTTCACGGTTGCCTACTGGT    |
| <i>Mlycd</i>   | TGCCAAGAAATCTCAGCGGT             | TTCTTGAGCCCAGGTAGGA     |
| <i>Ppp2r3c</i> | TGATGTTGCTGGCCAAGGAT             | CAGGGCAGAAGGAGCAGAAA    |
| <i>Rab14</i>   | TTCAGAGCGGTTACACGGAG             | ACATTCTCTCCCGTTTTTGCG   |
| <i>Tbp</i>     | ACCCTTCACCAATGACTCCTATG          | TGACTGCAGCAAATCGCTTGG   |
| <i>Polg</i>    | TGTGAATATCCCTGGTTGCTG            | CTTGGGCAGGAAATCTTTGG    |
| <i>Actb</i>    | GGCTGTATTCCTCCATCG               | CCAGTTGGTAACAATGCCATGT  |

30

**Supplementary Fig. 1: Hepatic Thrp3 expression is increased with fatty change.**

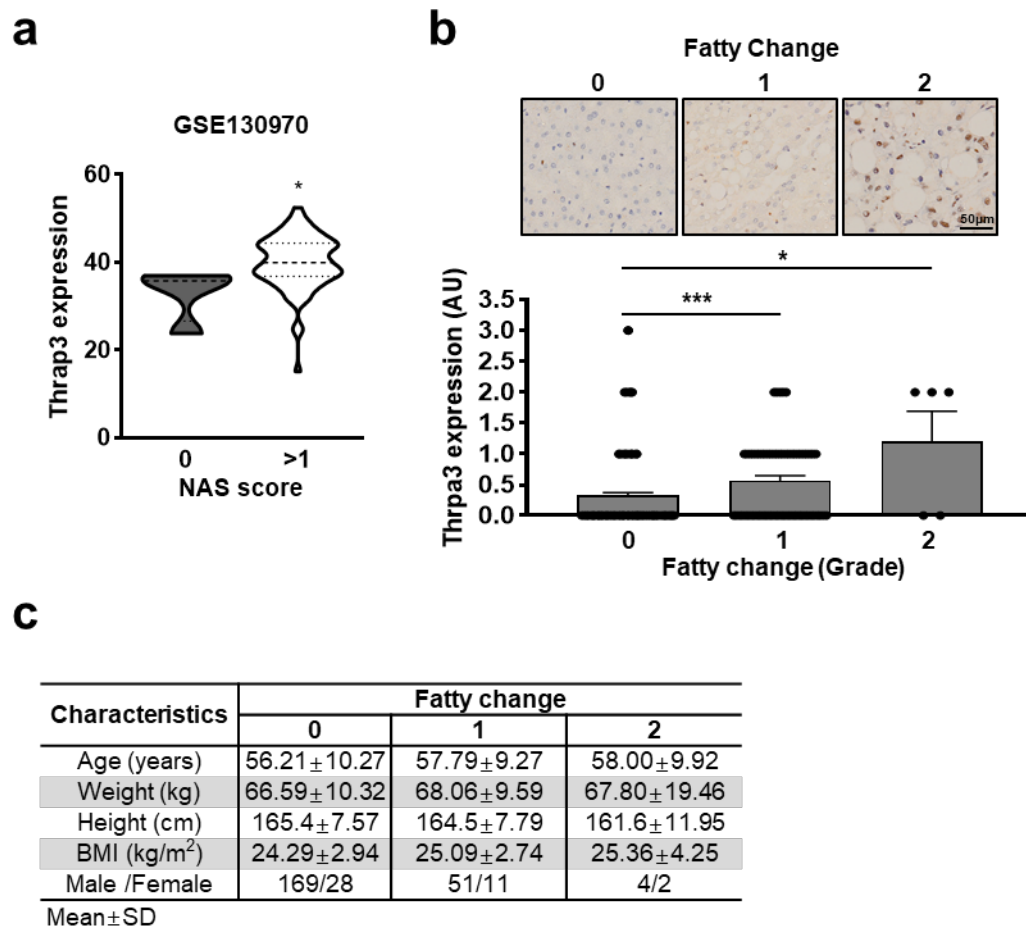

**Supplementary Fig. 1: Hepatic Thrp3 expression is increased with fatty change.**

**a** *Thrap3* expression was analyzed in the livers of NAFLD patients (GSE130970). *Thrap3* expressions were compared across the NAS score (0, n = 4; >1, n = 74). \**P* < 0.05 vs NAS score 0; **b**, **c** Liver sections were stratified into three main groups based on their histological fatty change profiles. The first group (grade 0) represented the control group, which included patients without liver steatosis (n = 197). The second group (grade 1) was represented by patients (n = 62) with mild fatty changes, defined by 5 % to 10 % of hepatocytes exhibiting cytoplasmic lipid droplets. The third group (grade 2) consisted of patients (n = 6) with severe fatty changes, defined by a proportion of hepatocytes containing lipid droplets exceeding 10 %. Expression of *Thrap3* was determined with anti-*Thrap3* antibody on the normal liver slide of HCC patients stratified into three main groups based on their histological fatty change profiles. Values represent means ± SEM. \**P* < 0.05, \*\*\**P* < 0.001 vs Fatty change Grade 0 (**b**). Characteristics of patients. Values represent means ± SD (**c**).



**Supplementary Fig. 3: Expression of genes involved in glycerolipid synthesis and fatty acid uptake.**

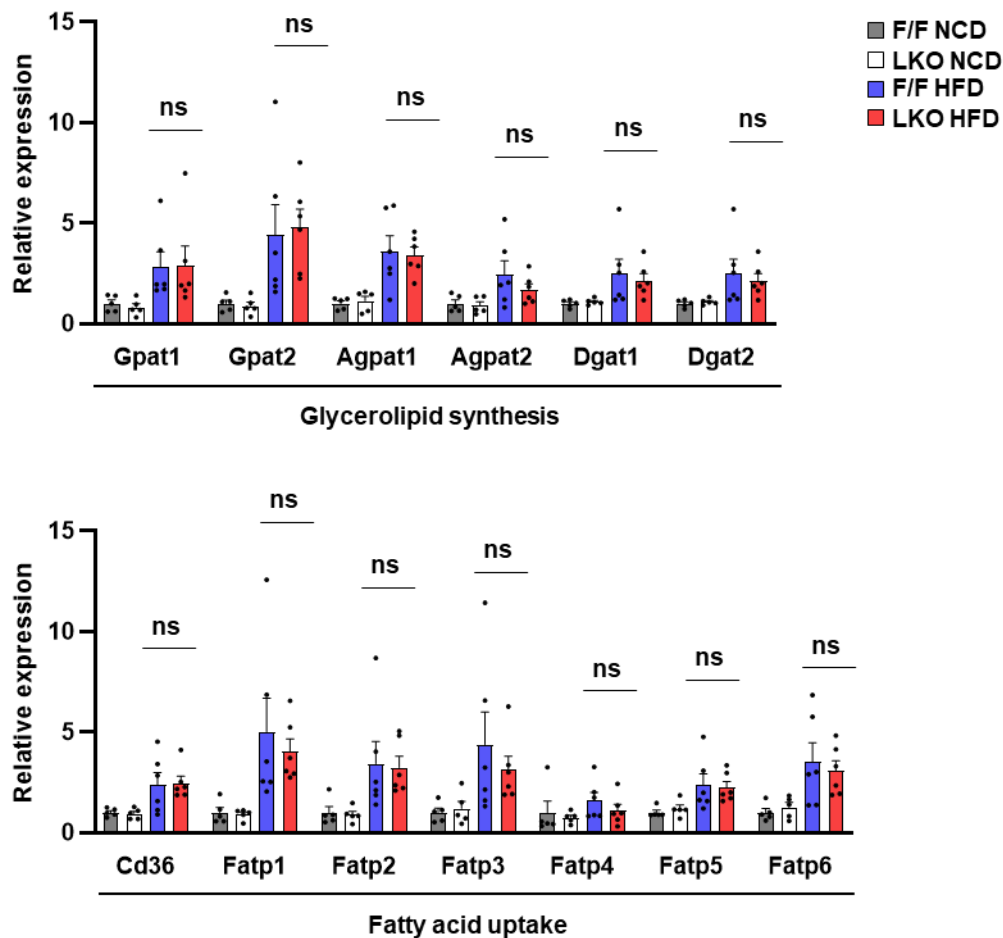

**Supplementary Fig. 3: Expression of genes involved in glycerolipid synthesis and fatty acid uptake.**

Genes related to glycerolipid synthesis and fatty acid uptake were determined by quantitative RT-PCR. Relative values are normalized to Thrsp3 F/F NCD (NCD, n = 5 per group; HFD, n = 6 per group). Values represent means  $\pm$  SEM. ns, not significant.
